# Supplementary material for: Watershed zonation approach for tractably quantifying above-and-belowground watershed heterogeneity and functions
Source: Copernicus journal article supplement (doi:10.5194/hess-2021-228), 2021-05-10
Supplement: Supplementary file 1 [file hess-2021-228-supplement.zip]

## Supporting Information for “Watershed zonation approach for tractably quantifying above-and-belowground watershed heterogeneity and functions”

### Texts S1. Airborne Data Descriptions

The National Ecological Observation Network (NEON) team collected airborne hyperspectral and LiDAR data in June 2018, which corresponds roughly to the peak growing season in these catchments. The pre-campaign planning, acquisition procedures, and postprocessing are described in detail by Chadwick et al. (2020). The onboard instrumentation includes Airborne Visible-Infrared Imaging Spectrometer - Next Generation (AVIRIS-NG), which measures surface reflectance over the range of 380-2510 nm with the spectral resolution of 5 nm (426 spectral bands). After the standard postprocessing, we used data products including aboveground biomass, Leaf Area Index (LAI), Normalized Difference Vegetation Index (NDVI), Normalized Difference Water Index (NDWI), and Normalized Difference Nitrogen Index (NDNI).

NASA Airborne Snow Observatory (ASO) data were collected in April 2018, which corresponds to the peak snow timing. ASO couples an imaging spectrometer and scanning LiDAR, as well as distributed snow modeling, to estimate snow depth and snow-water-equivalent (SWE) over the watersheds (Painter et al., 2016). (These datasets are publicly available at <https://nsidc.org/data/aso>.) From these data products, we incorporated the peak SWE map at 50 m resolution (<https://www.jpl.nasa.gov/missions/airborne-snow-observatory-aso/>).

An airborne electromagnetic (AEM) survey was conducted in fall 2017. The detailed descriptions are available in Zamudio et al. (2020) and Uhlemann et al. (submitted). We used the electrical resistivity averaged over the top 20 meters from the land surface as near-surface electrical resistivity, which is considered as a proxy for bedrock properties, including fracture density, weathering, and hydrothermal alteration. Since the data does not cover the entire domain, we gap-filled the datasets by assigning the average value of the same geology at each pixel.

## Texts 2. Characteristics of cluster methods

- K-means (KM) is the most commonly used clustering method. The K-means algorithm identifies clusters by minimizing an objective function called inertia, which is the total average intra-cluster distance between samples assigned to a cluster and its centroid. The K-means algorithm starts from a random set of starting points. A sufficient number of random sets are used so that clusters converge.
- Hierarchical clustering (HC) is a decision-tree-based method that divides data points based on a series of binary splits. It is agglomerative clustering, which begins by considering each data point as an individual cluster, then progressively merges clusters at increasing levels of dissimilarity until all data points form one large cluster (Kassambara, 2017). To define the linkage (or the distance) between any two clusters, we used the Ward method, which has been successfully used for ecosystem zonation at the hillslope scale (Devadoss et al., 2020). Ward's method computes the variance within each cluster, measuring the distance between each observation and the cluster's mean, and then taking the sum of the distances' squared.
- Gaussian mixture models (GMM) are often called soft clustering, which allows us to determine a probability or membership degree for each sample to belong to each cluster, instead of deterministic clusters. The distribution of datasets in the multidimensional space is approximated by the weighted sum of multivariate Gaussian distributions. The expectation maximization algorithm is used to maximize the likelihood of parameters that define a Gaussian distribution for each cluster. In addition, GMM evaluates the number of clusters based on the Bayesian Information Criterion (BIC), which is a function of the maximized likelihood and the number of parameters (i.e., the number of clusters). Geometric features (shape, volume, orientation) of each cluster can be specified or optimized through BIC as EII, VII, EEI, VEI, EVI, VVI, EEE, EEV, VEV, and VVV. E stands for "equal", V for "variable" and I for "coordinate axes" in the order of volume, shape and orientation.

Table S1. The list of 16 hillslope features.

|    | Variable    | Computation in each hillslope                                                                              |
|----|-------------|------------------------------------------------------------------------------------------------------------|
| 1  | Elevation   | Hillslope average of elevation (LiDAR)                                                                     |
| 2  | Slope       | Hillslope average of slope (LiDAR)                                                                         |
| 3  | Relief      | The difference between the minimum and maximum elevation (LiDAR)                                           |
| 4  | TWI         | Hillslope average of TWI (LiDAR)                                                                           |
| 5  | Radiation   | Hillslope average of annual net potential radiation (LiDAR)                                                |
| 6  | Resistivity | Hillslope average of top-20-m bedrock resistivity (AEM)                                                    |
| 7  | NDVI        | Hillslope average of peak NDVI (NEON hyperspectral + LiDAR) in 2018                                        |
| 8  | NDWI        | Hillslope average of NDWI (NEON hyperspectral + LiDAR) corresponding to the peak phenology timing in 2018. |
| 9  | Biomass     | Hillslope average of peak aboveground biomass (NEON hyperspectral + LiDAR) in 2018                         |
| 10 | SWE         | Hillslope average of peak SWE (NASA ASO) in 2018                                                           |
| 11 | %Igneous    | Percent coverage of igneous rock                                                                           |
| 12 | %Sandstone  | Percent coverage of sandstone                                                                              |
| 13 | %Evergreen  | Percent coverage of evergreen forest                                                                       |
| 14 | %Aspen      | Percent coverage of aspen                                                                                  |
| 15 | %Bare       | Percent coverage of bare ground                                                                            |

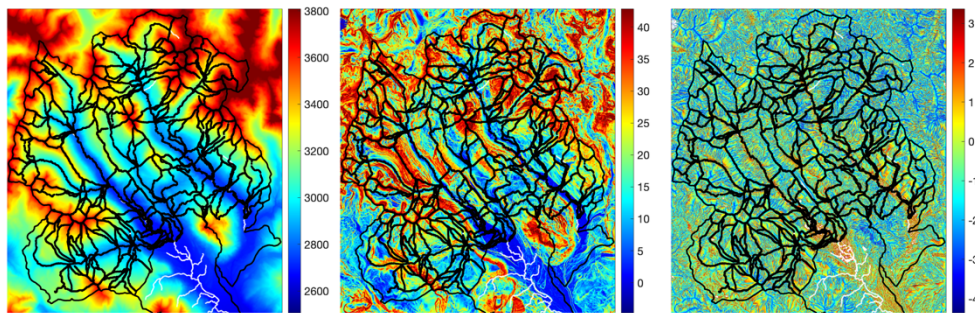

(a)

(b)

(c)

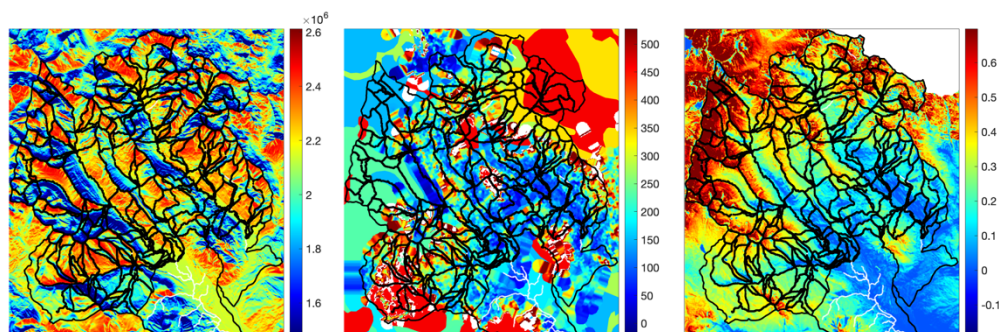

(d)

(e)

(f)

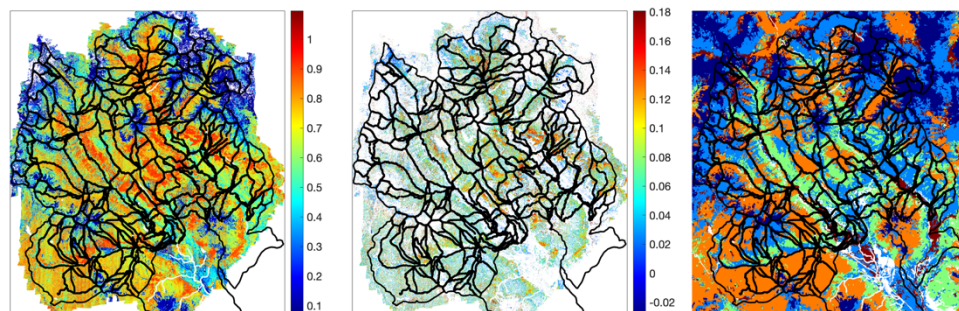

(g)

(h)

(i)

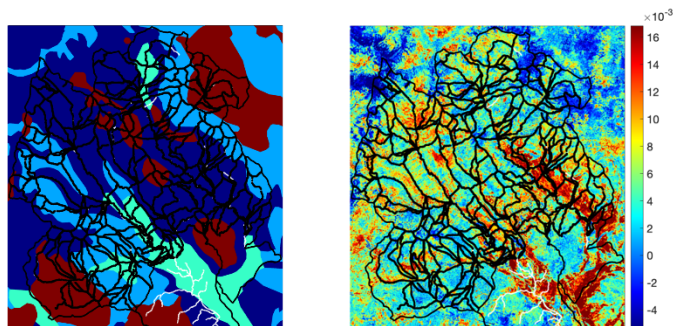

(j)

(k)

Figure S1. Spatial data layers: (a) elevation in meter, (b) slope in degrees, (c) log10-TWI, (d) net potential radiation in  $\text{W/m}^2$ , (e) top 20-m electrical resistivity in Ohm. m, (f) 2018 peak SWE in meters, (g) NDVI in July 2018, and (h) NDWI in July 2018, (i) 2011 NLCD landcover map, and (j) geological map and (k) foresummer drought sensitivity from Wainwright et al. (2020). In (i), the dark blue region is barren, the right blue is grassland, the green is aspen forest and the orange is evergreen forest, and the red is a riparian region. In (j), the dark blue region is shale, the light blue is sandstone, the red is igneous rock, and the white-green is glacial deposit.

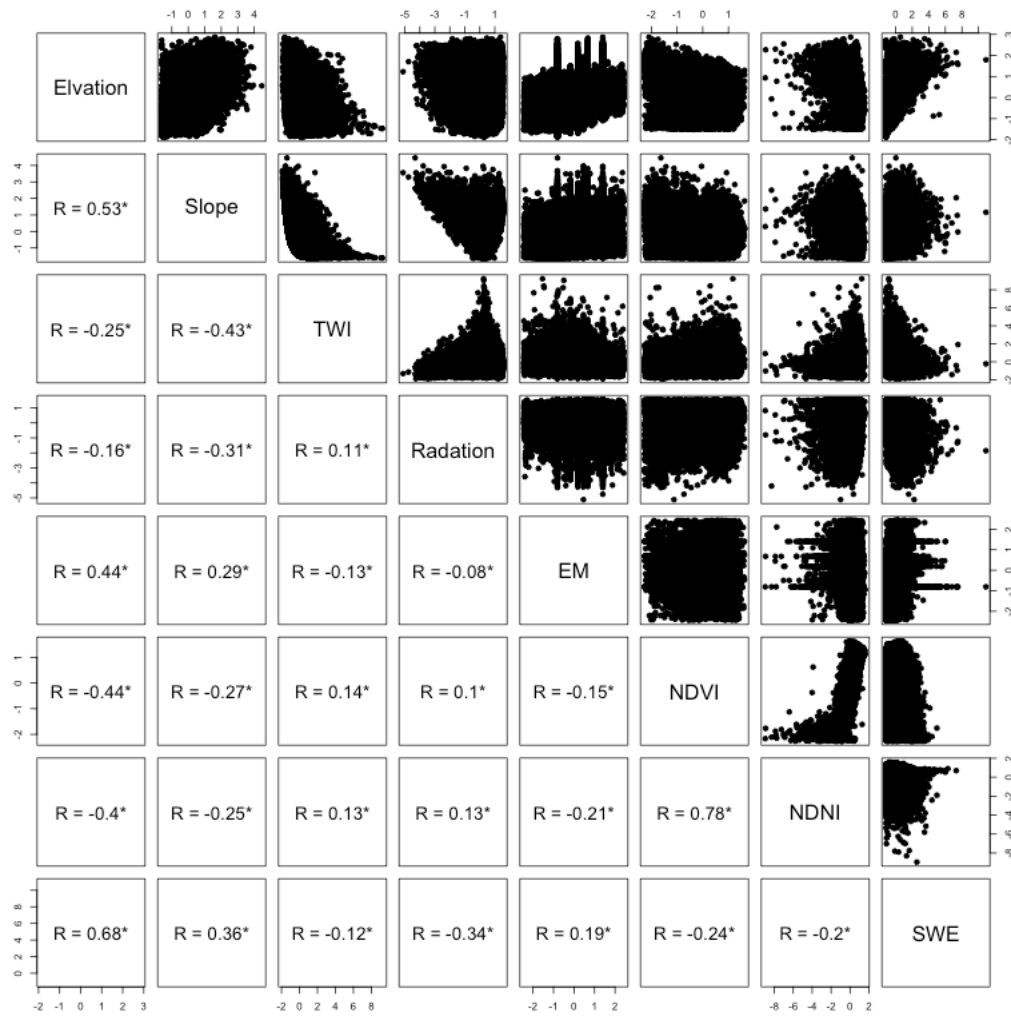

Figure S2. Pixel-by-pixel correlation and scatter plots (Pearson's correlation coefficients) among selected metrics. The \* sign represents that the p-values are smaller than 0.01.

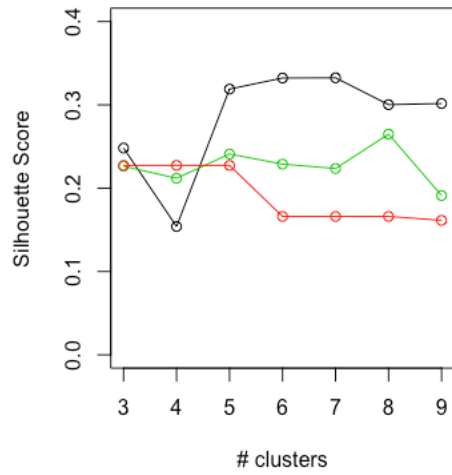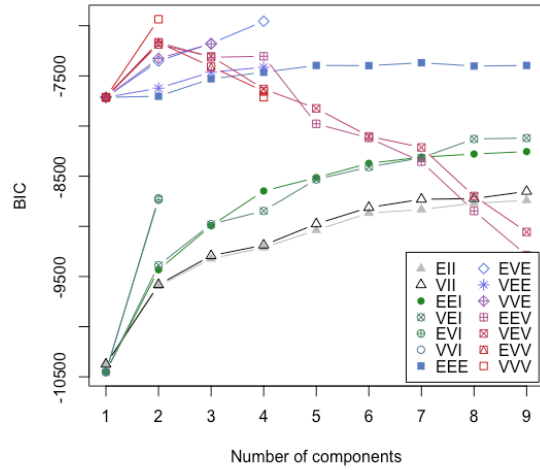

(a)

(b)

Figure S3. Cluster metrics: (a) silhouette score, and (b) Bayesian Information Criteria (BIC) as a function of the number of clusters. In (a), the black line is GMM, the red line is KM, and the green line is HC. In (a), the silhouette score is defined in the range  $[-1, +1]$ ; a higher value means that data points are closer in its own clusters than with the ones in other clusters. In (b), geometric features (shape, volume, orientation) of each cluster can be specified or optimized through BIC as EII, VII, EEI, VEI, EVI, VVI, EEE, EEV, VEV, and VVV. E stands for “equal”, V for “variable” and I for “coordinate axes” in the order of volume, shape and orientation.

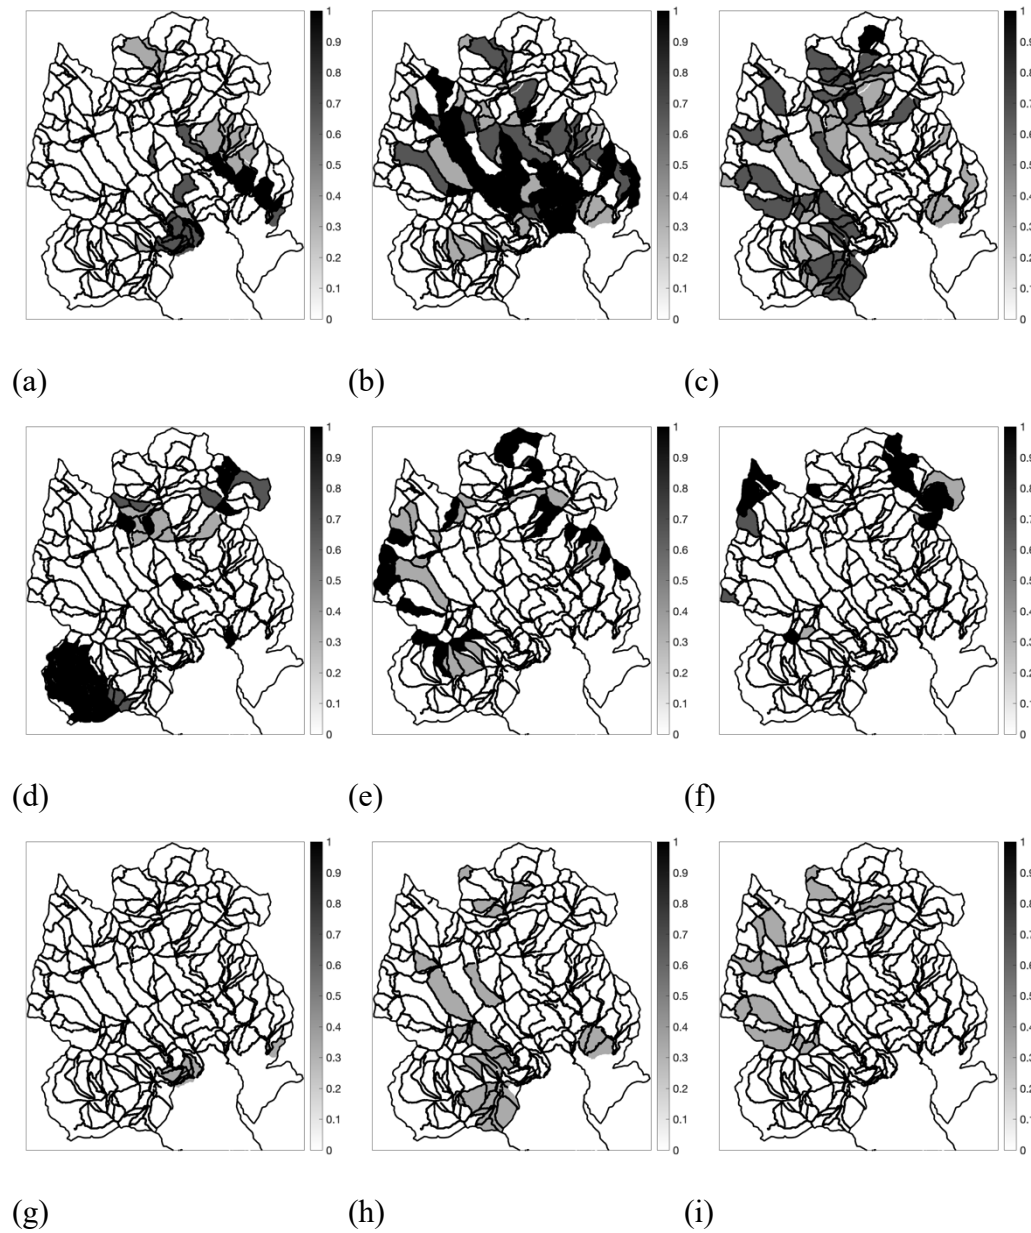

Figure S4. Frequency of each hillslope being categorized into each zone across the three clustering methods: (a) Zone 1, (b) Zone 2, (c) Zone 3, (d) Zone 4, (e) Zone 5, (f) Zone 6, (g) Zone 7, (h) Zone 8, and (i) Zone 9. The frequency is normalized to one such that it is one when the three methods agree with each other.
